# Supplementary material for: Theoretical Prediction of the Complex P-Glycoprotein Substrate Efflux Based on the Novel Hierarchical Support Vector Regression Scheme
Source: Preprints.org preprint supplement (doi:10.20944/preprints201807.0092.v1), 2018-07-05
Supplement: Supplementary file 1 [file supplementary]

Theoretical Prediction of the Complex P-Glycoprotein Substrate Efflux Based on the Novel Hierarchical Support Vector Regression Scheme

Chun Chen1, Ming-Han Lee1, Ching-Feng Weng2, and Max K. Leong1,2,*

1Department of Chemistry, National Dong Hwa University, Shoufeng, Hualien 97401, Taiwan

2Department of Life Science and Institute of Biotechnology, National Dong Hwa University, Shoufeng, Hualien 97401, Taiwan

*Correspondence: leong@mail.ndhu.edu.tw


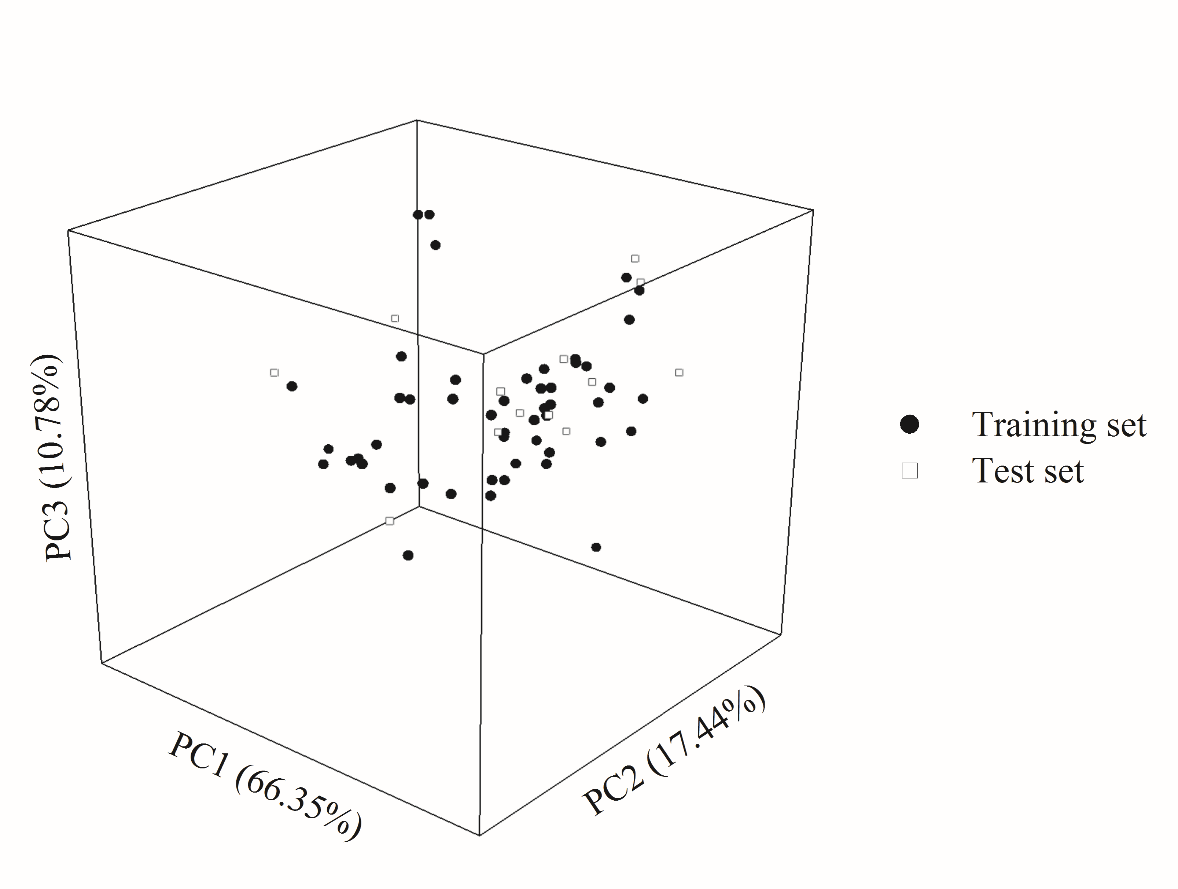


**Figure S1.** Molecular distribution for the samples in the training set (solid circle) and test set (open square) in the chemical space spanned by three principal components.


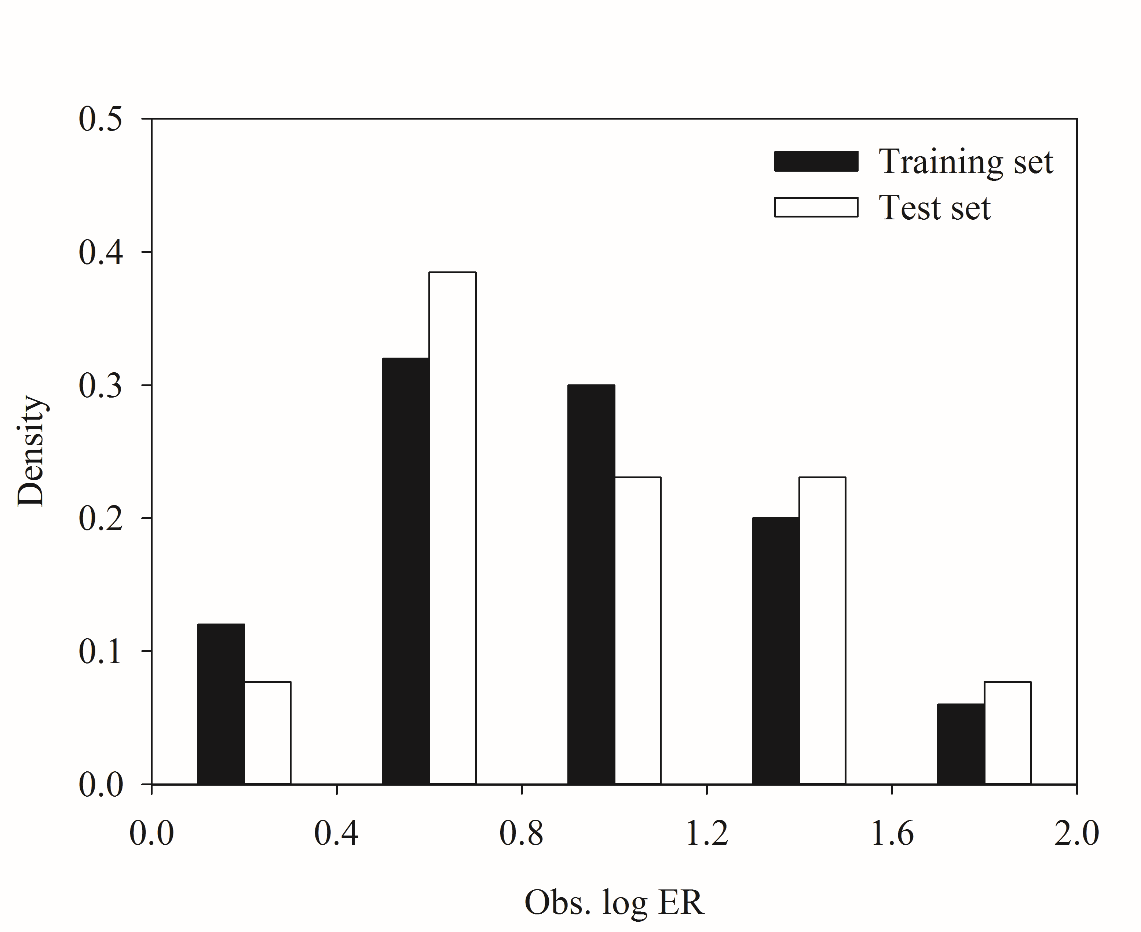


(A)


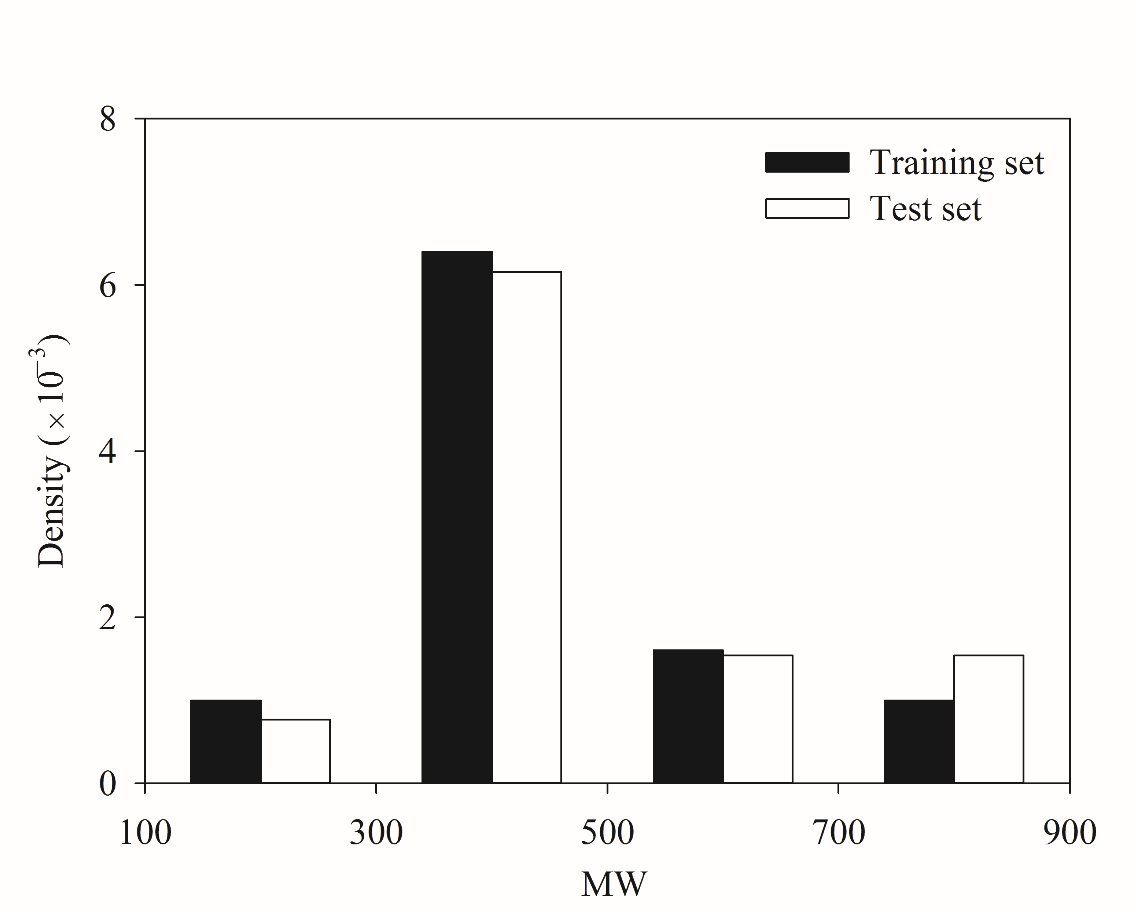


(B)


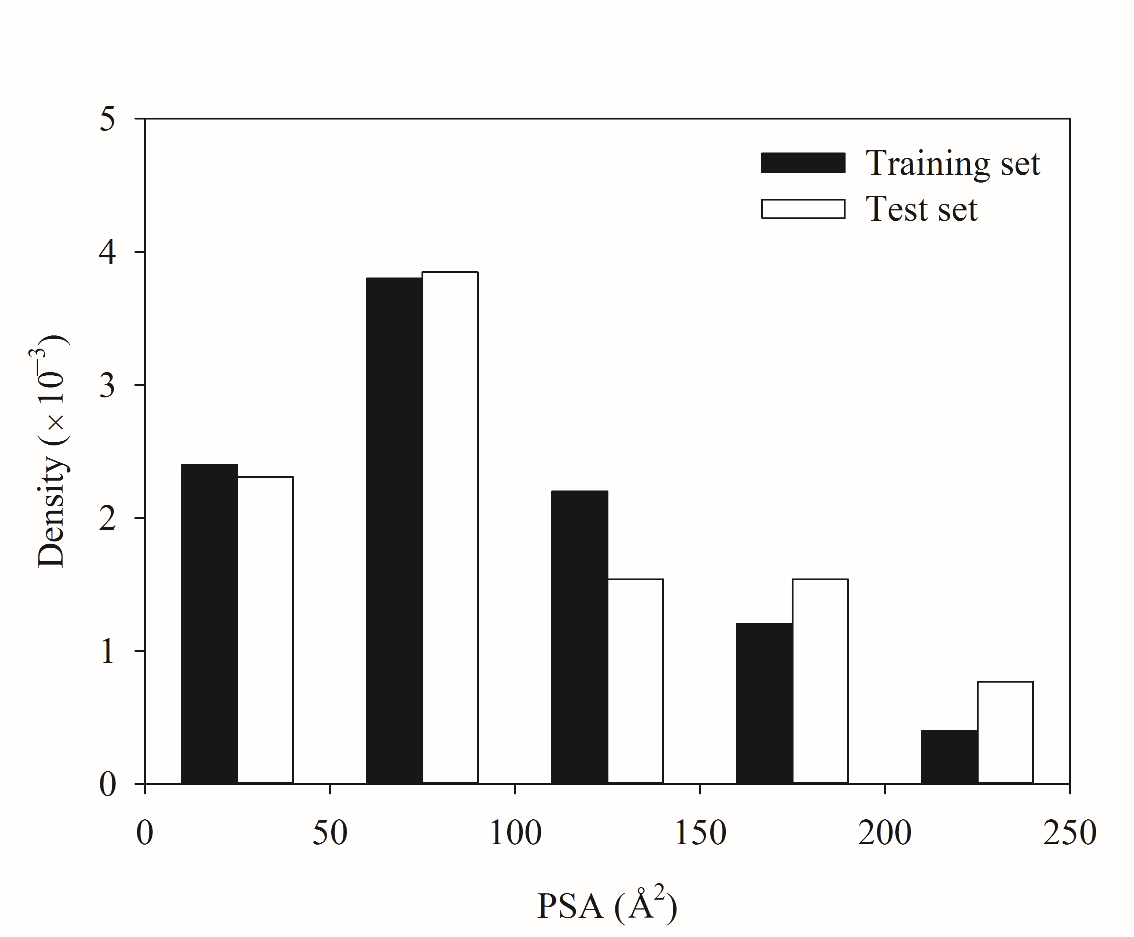


(C)


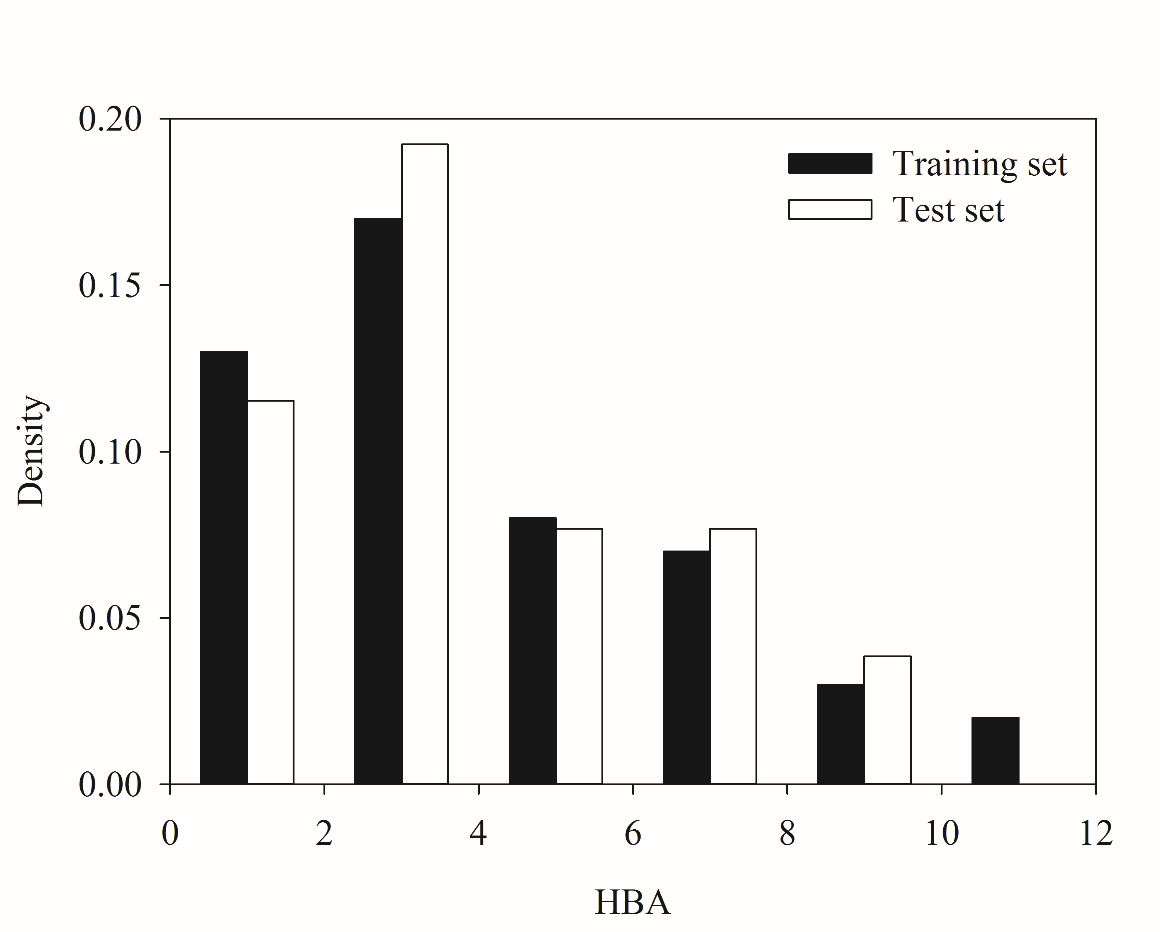


(D)


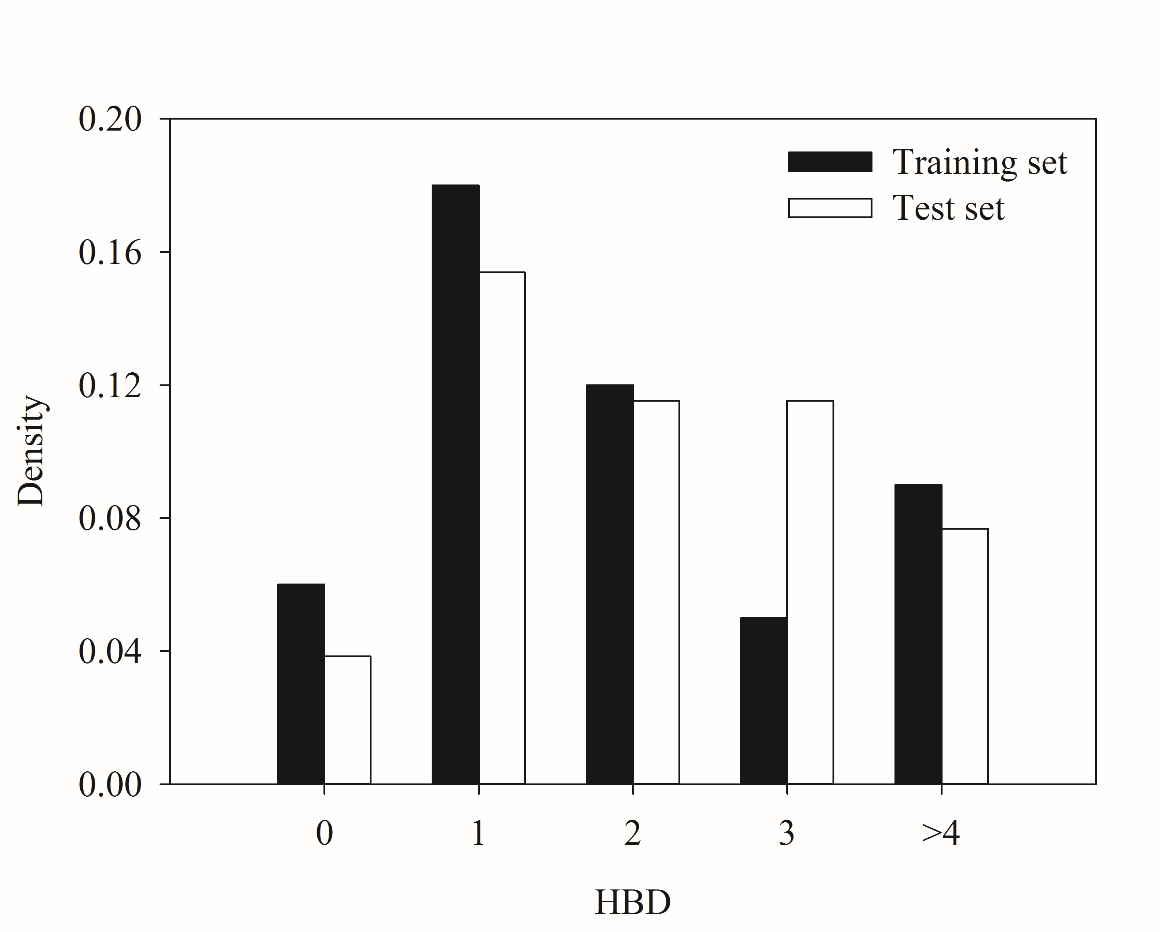


(E)

**Figure S2.** Histograms of (A) observed log ER, (B) molecular weight (MW), (C) polar surface area (PSA), (D) number of hydrogen bond acceptor (HBA), and (E) number of hydrogen bond donor (HBD) in density form for all molecules in the training set and test set.
